# Supplementary material
Source: Springer Nature journal article supplement (https://www.springermedizin.de/resource/supplementary/12981_2008_82_MOESM2_ESM.pdf/9603834)

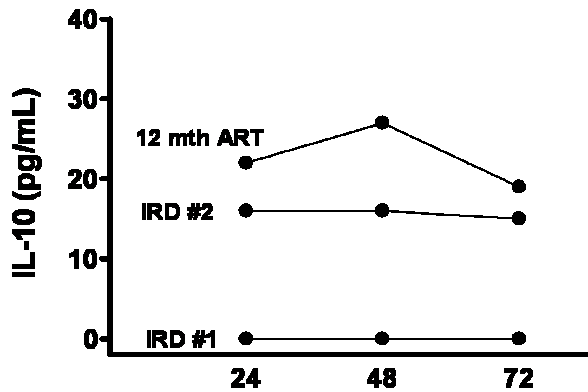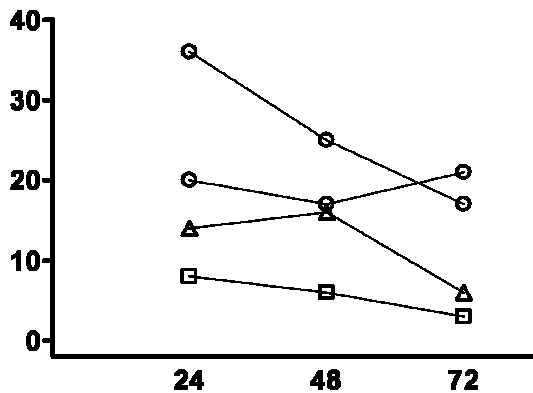

Supplement: MOESM2 [file 9603834]
